# Supplementary material for: Stereocomplex crystallization in cyclic polymer blends studied using dynamic Monte Carlo simulations
Source: Royal Society of Chemistry journal article supplement (doi:10.1039/d2ce01043g), 2023-01-01
Supplement: d2ce01043g1.pdf [file d2ce01043g1.pdf]

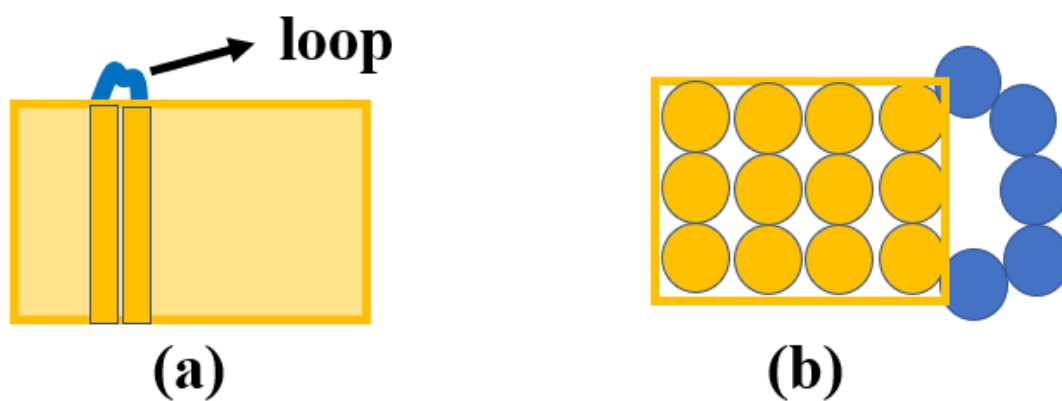

Figure S1. (a) Schematic diagram of the short loops connecting two crystalline stems; (b) schematic diagram of the amorphous segments connecting two ends of one crystalline stem.
